# Supplementary material for: Potency of bisresorcinol from Heliciopsis terminalis on skin aging: in vitro bioactivities and molecular interactions
Source: PeerJ. 2021 Jun 22;9:e11618. doi: 10.7717/peerj.11618 (PMC8231342; doi:10.7717/peerj.11618)
Supplement: Supplemental Information 3 [file peerj-09-11618-s003.xlsx]

## Sheet: Fig2
collagenase		% inhibition
	uM	1	2	3	ave	sd	sem
bisresorcinol	226	82.28	81.54	80.12	81.3133	1.09769	0.633754
	210	77.298	74.195	74.082	75.1917	1.82501	1.05367
	180	63.129	59.765	60.096	60.9967	1.85406	1.07044
	150	48.96	45.335	46.11	46.8017	1.90892	1.10211
	113	38.51	27.91	32.48	32.9667	5.31673	3.06962
	56	0	0	0	0	5.52	3.18697
caffeic acid	560	71.84	74.23	72.24	72.77	1.28012	0.739076
	280	50.5	50.77	52.14	51.1367	0.879337	0.507685
	210	40.852	35.485	43.821	40.0527	4.22509	2.43936
	180	38.026	31.96	41.388	37.1247	4.77819	2.75869
	150	35.2	28.435	38.955	34.1967	5.33129	3.07802
	140	37.46	22.54	31.12	30.3733	7.48797	4.32318
elastase	uM	1	2	3	ave	sd	sem
Bisresorcinol	45	99.6448	99.5814	99.759	99.6617	0.0900027	0.0519631
	40	70.137	71.91	77.743	73.2633	3.9795	2.29757
	35	50.658	54.3345	62.338	55.7768	5.97209	3.44799
	34	46.4925	30.8893	26.7665	34.7161	10.4049	6.00728
	30	31.179	36.759	46.933	38.2903	7.98786	4.61179
	23	30.1408	20.2842	11.8737	20.7662	9.14308	5.27876
Ursolic acid	100	87.2	89.73	85.61	87.5133	2.0778	1.19962
	50	72.78	74.42	69.89	72.3633	2.29356	1.32419
	40	53.24	53.849	54.069	53.7193	0.429442	0.247938
	35	51.0765	50.3555	49.9315	50.4545	0.578884	0.334219
	30	48.084	46.862	46.623	47.1897	0.78368	0.452458
	10	26.21	25.34	30.65	27.4	2.848	1.64429
tyrosinase	uM	1	2	3	ave	sd	sem
Bisresorcinol	50	137.51	143.96	155.88	100	9.31974	5.38076
	40	118.543	111.589	106.587	100	6.0045	3.4667
	34	86.35	84.72	81.68	84.25	2.37021	1.36844
	30	81.83	78.93	74.78	78.5133	3.54342	2.0458
	28	81.83	78.93	74.78	78.5133	3.54342	2.0458
	10	52.37	46.29	34.5	44.3867	9.08577	5.24567
arbutin	92	59.72	62.06	54.48	58.7533	3.88136	2.2409
	50	30.4833	37.375	35.4433	34.4339	3.55501	2.05249
	46	31.16	29.87	25.37	28.8	3.03969	1.75496
	40	25.724	24.5853	24.5147	24.9413	0.678728	0.391864
	30	18.71	18.69	17.85	18.4167	0.49085	0.283392

## Sheet: Tab1
	Collagenase
			% inhibition			ave	sd		ic50
		conc	N1	N2	N3				N1	N2	N3	ave	sd	sem
	bisresorcinol	100 ug/ml	82.28	81.54	80.12	81.3133	1.09769	ug/ml	67.4723	70.7907	70.1844	69.4825	1.76706
		50 ug/ml	38.51	27.91	32.48	32.9667	5.31673	uM	152.206	159.695	158.319	156.74	3.98669	2.30172
		25 ug/ml	0	0	0	0	0
	caffeic acid	56 mM	71.84	74.23	72.24	72.77	1.28012
		28 mM	50.5	50.77	52.14	51.1367	0.879337
		14 mM	37.46	22.54	31.12	30.3733	7.48797	uM	286.19	333.532	307.113	308.945	23.7241	13.6971
	elastase
	bisresorcinol	20 ug/ml	99.6448	99.5814	99.759	99.6617	0.0900027	ug/ml	13.7398	14.9683	15.4401	14.716	0.877756
		15 ug/ml	46.4925	30.8893	26.7665	34.7161	10.4049	uM	30.9956	33.767	34.8312	33.1979	1.98013	1.14323
		10 ug/ml	30.1408	20.2842	11.8737	20.7662	9.14308
	Ursolic acid	100 uM	87.2	89.73	85.61	87.5133	2.0778
		50 uM	72.78	74.42	69.89	72.3633	2.29356
		10 uM	26.21	25.34	30.65	27.4	2.848	uM	35.1035	34.4912	33.2013	34.2654	0.970995	0.560604
	tyrosinase
	bisresorcinol	15 ug/ml	86.35	84.72	81.68	84.25	2.37021	ug/ml	9.03958	9.90047	11.0531
		12.5 ug/ml	81.83	78.93	74.78	78.5133	3.54342	uM	20.3924	22.3345	24.9347	22.5539	2.27907	1.31582
		10 ug/ml	52.37	46.29	34.5	44.3867	9.08577
	Arbutin	25 ug/ml	59.72	62.06	54.48	58.7533	3.88136
		15 ug/ml	36.872	36.308	31.192	34.7907	3.12927	ug/ml	20.7458	20.3169	23.0763
		12.5 ug/ml	31.16	29.87	25.37	28.8	3.03969	uM	76.2013	74.6258	84.7613	78.5295	5.45412	3.14894
